# Supplementary material for: “A dose of relief?”: Results of an international survey exploring self-reported effectiveness, dose and dosage forms of cannabis for endometriosis pain and related symptoms
Source: Research Square preprint supplement (doi:10.21203/rs.3.rs-6910005/v1), 2025-07-25
Supplement: Supplementary file 1 [file 67fc4b03e5a118be5a896d2f.docx]

**Supplementary File 4 – Dosage form and self-rated effectiveness – Oral oils (e.g., THC/CBD oil)**

| **Oil (oral) (e.g., THC/CBD oil)** | **N** | **Mean (SD)** | | **Median (IQR)** | | **Min to Max** |
| --- | --- | --- | --- | --- | --- | --- |
| **Yes** |  |  | |  | |  |
| Period pain | 240 | 7.3 (2.1) | | 7.6 (6.2 to 9) | | 0.6 to 10 |
| Heavy menstrual bleeding | 125 | 2.7 (2.9) | | 1.4 (0.2 to 4.9) | | 0 to 10 |
| Chronic pelvic pain | 266 | 7.3 (2.1) | | 7.9 (6 to 8.8) | | 0 to 10 |
| Bowel symptoms | 238 | 5.1 (2.9) | | 5 (3 to 7.5) | | 0 to 10 |
| Bladder symptoms | 173 | 4.7 (2.8) | | 5 (2.6 to 7) | | 0 to 10 |
| Nausea | 221 | 7.4 (2.8) | | 8 (5.6 to 10) | | 0 to 10 |
| Back pain | 257 | 6.9 (2.5) | | 7.5 (5.5 to 8.9) | | 0 to 10 |
| Headache or migraine | 196 | 6.2 (2.9) | | 7 (5 to 8.4) | | 0 to 10 |
| Gastrointestinal symptoms | 201 | 5 (3.1) | | 5 (2.1 to 7.3) | | 0 to 10 |
| Fatigue | 227 | 4.1 (3.2) | | 4 (1 to 6.6) | | 0 to 10 |
| Anxiety | 233 | 6.6 (2.9) | | 7.6 (5 to 9) | | 0 to 10 |
| Depression | 180 | 5.9 (3.1) | | 6.5 (3.6 to 8.5) | | 0 to 10 |
| Difficulties with sleep | 255 | 8.1 (2.4) | | 8.8 (7.5 to 10) | | 0 to 10 |
| Painful sex | 181 | 5.9 (3.3) | | 6.7 (4 to 8.5) | | 0 to 10 |
| **No** |  |  | |  | |  |
| Period pain | 568 | 7.5 (1.9) | | 7.9 (6.3 to 9) | | 0.6 to 10 |
| Heavy menstrual bleeding | 281 | 2.3 (2.7) | | 1 (0 to 3.9) | | 0 to 10 |
| Chronic pelvic pain | 596 | 7.3 (2.1) | | 7.9 (6 to 9) | | 0 to 10 |
| Bowel symptoms | 476 | 5.1 (3) | | 5.1 (2.9 to 7.5) | | 0 to 10 |
| Bladder symptoms | 348 | 4.3 (3.1) | | 4.5 (1.5 to 7) | | 0 to 10 |
| Nausea | 485 | 7.3 (2.8) | | 8 (5.6 to 10) | | 0 to 10 |
| Back pain | 575 | 7.3 (2.2) | | 7.6 (5.8 to 9) | | 0 to 10 |
| Headache or migraine | 450 | 6.1 (2.9) | | 6.5 (4.1 to 8.3) | | 0 to 10 |
| Gastrointestinal symptoms | 407 | 5.1 (3.1) | | 5.1 (2.5 to 7.5) | | 0 to 10 |
| Fatigue | 471 | 3.7 (3.1) | | 3.1 (0.7 to 6) | | 0 to 10 |
| Anxiety | 509 | 6.7 (3) | | 7.3 (5 to 9.2) | | 0 to 10 |
| Depression | 441 | 6.5 (2.9) | | 7 (4.9 to 8.8) | | 0 to 10 |
| Difficulties with sleep | 542 | 8.4 (2.1) | | 9.1 (7.5 to 10) | | 0 to 10 |
| Painful sex | 428 | 6.1 (3.1) | | 6.7 (4 to 8.8) | | 0 to 10 |
| **Comparison Oil (oral) Yes minus No** | | | | | | |
| **Variable** | | | **Difference (95% CI)** | | **P** | |
| Period pain | | | -0.20 (-0.50 to 0.10) | | 0.19 | |
| Heavy menstrual bleeding | | | 0.44 (-0.12 to 1.02) | | 0.14 | |
| Chronic pelvic pain | | | -0.07 (-0.38 to 0.23) | | 0.64 | |
| Bowel symptoms | | | -0.04 (-0.50 to 0.42) | | 0.86 | |
| Bladder symptoms | | | -.41 (-0.15 to 0.96) | | 0.15 | |
| Nausea | | | 0.06 (-0.39 to 0.51) | | 0.78 | |
| Back pain | | | -0.37 (-0.71 to -0.02) | | 0.04 | |
| Headache or migraine | | | 0.11 (-0.37 to 0.59) | | 0.65 | |
| Gastrointestinal symptoms | | | -0.09 (-0.61 to 0.44) | | 0.75 | |
| Fatigue | | | 0.37 (-0.12 to 0.86) | | 0.14 | |
| Anxiety | | | -0.02 (-0.48 to 0.44) | | 0.94 | |
| Depression | | | -0.54 (-1.06 to -0.02) | | 0.04 | |
| Difficulties with sleep | | | -0.34 (-0.68 to -0.01) | | 0.04 | |
| Painful sex | | | -0.23 (-0.79 to 0.32) | | 0.41 | |
