# Supplementary material for: “A dose of relief?”: Results of an international survey exploring self-reported effectiveness, dose and dosage forms of cannabis for endometriosis pain and related symptoms
Source: Research Square preprint supplement (doi:10.21203/rs.3.rs-6910005/v1), 2025-07-25
Supplement: Supplementary file 2 [file e77f12d7e96ddb09f2d1a6ec.docx]

**Supplementary File 3 – Dosage form and self-rated effectiveness – Dried cannabis bud (flower) – joint.**

| **Dried cannabis bud (flower) - joints** | **N** | **Mean (SD)** | **Median (IQR)** | **Min to Max** |
| --- | --- | --- | --- | --- |
| **Yes** |  |  |  |  |
| Period pain | 382 | 7.7 (1.9) | 8 (6.8 to 9) | 0.8 to 10 |
| Heavy menstrual bleeding | 193 | 2.6 (2.9) | 1.4 (0.1 to 4.8) | 0 to 10 |
| Chronic pelvic pain | 401 | 7.6 (2.1) | 8 (6.5 to 9) | 0 to 10 |
| Bowel symptoms | 319 | 5.3 (2.9) | 5.4 (3 to 7.7) | 0 to 10 |
| Bladder symptoms | 247 | 4.7 (3.1) | 5 (2 to 7) | 0 to 10 |
| Nausea | 343 | 7.6 (2.7) | 8.3 (6.3 to 10) | 0 to 10 |
| Back pain | 390 | 7.4 (2.2) | 8 (6 to 9) | 0 to 10 |
| Headache or migraine | 315 | 6.5 (2.7) | 7 (5 to 8.5) | 0 to 10 |
| Gastrointestinal symptoms | 280 | 5.1 (3.1) | 5.1 (3 to 7.5) | 0 to 10 |
| Fatigue | 331 | 4.1 (3.1) | 4 (1 to 6.5) | 0 to 10 |
| Anxiety | 350 | 6.8 (2.9) | 7.6 (5 to 9.3) | 0 to 10 |
| Depression | 307 | 6.6 (2.9) | 7.1 (5 to 9) | 0 to 10 |
| Difficulties with sleep | 378 | 8.6 (2) | 9.4 (7.8 to 10) | 0 to 10 |
| Painful sex | 286 | 6.3 (3.1) | 7 (4.5 to 8.8) | 0 to 10 |
| **No** |  |  |  |  |
| Period pain | 426 | 7.1 (2.1) | 7.5 (6 to 8.6) | 0.6 to 10 |
| Heavy menstrual bleeding | 213 | 2.2 (2.7) | 1 (0 to 4) | 0 to 10 |
| Chronic pelvic pain | 461 | 7.1 (2.1) | 7.5 (6 to 8.5) | 0 to 10 |
| Bowel symptoms | 395 | 4.9 (3) | 5 (3 to 7.5) | 0 to 10 |
| Bladder symptoms | 274 | 4.2 (3) | 4.1 (1.8 to 6.6) | 0 to 10 |
| Nausea | 363 | 7 (2.9) | 8 (5.1 to 9.8) | 0 to 10 |
| Back pain | 442 | 6.9 (2.4) | 7.3 (5.3 to 8.9) | 0 to 10 |
| Headache or migraine | 331 | 5.9 (3) | 6.1 (4 to 8.2) | 0 to 10 |
| Gastrointestinal symptoms | 328 | 4.9 (3.1) | 5 (2 to 7.4) | 0 to 10 |
| Fatigue | 367 | 3.5 (3) | 3 (0.6 to 6) | 0 to 10 |
| Anxiety | 392 | 6.5 (3) | 7.2 (4.8 to 9) | 0 to 10 |
| Depression | 314 | 6 (3) | 6.5 (4 to 8.4) | 0 to 10 |
| Difficulties with sleep | 419 | 8.1 (2.4) | 9 (7.3 to 10) | 0 to 10 |
| Painful sex | 323 | 5.8 (3.2) | 6 (3.4 to 8.7) | 0 to 10 |
| **Dried cannabis bud (flower) – joint = Yes minus No** | | | | |

| **Variable** | **Difference (95% CI)** | **P** |
| --- | --- | --- |
| Period pain | 0.54 (-.26 to 0.81) | 0.0001 |
| Heavy menstrual bleeding | 0.38 (-0.16 to 0.92) | 0.16 |
| Chronic pelvic pain | 0.50 (0.22 to 0.78) | 0.0005 |
| Bowel symptoms | 0.40 (-0.04 to 0.83) | 0.07 |
| Bladder symptoms | 0.44 (-0.08 to 0.96) | 0.10 |
| Nausea | 0.62 (0.21 to 1.04) | 0.004 |
| Back pain | 0.48 (0.17 to 0.80) | 0.003 |
| Headache or migraine | 0.64 (0.20 to 1.08) | 0.004 |
| Gastrointestinal symptoms | 0.20 (-0.29 to 0.69) | 0.42 |
| Fatigue | 0.61 (0.15 to 1.07) | 0.009 |
| Anxiety | 0.33 (-0.10 to 0.76) | 0.13 |
| Depression | 0.63 (0.16 to 1.10) | 0.009 |
| Difficulties with sleep | 0.46 (0.15 to 0.77) | 0.004 |
| Painful sex | 0.52 (0.01 to 1.02) | 0.045 |
