# Supplementary material for: “A dose of relief?”: Results of an international survey exploring self-reported effectiveness, dose and dosage forms of cannabis for endometriosis pain and related symptoms
Source: Research Square preprint supplement (doi:10.21203/rs.3.rs-6910005/v1), 2025-07-25
Supplement: Supplementary file 3 [file fb6e6d9b6f31d8411ba9f84a.docx]

**Supplementary File 2**

**Self-reported effectiveness of cannabis across common endometriosis symptoms.**

| **Variable** | **N** | **Mean (SD)** | **Median (IQR)** | **Min to Max** |
| --- | --- | --- | --- | --- |
| How effective cannabis was in reducing difficulties with sleep | 797 | 8.3 (2.2) | 9 (7.5 to 10) | 0 to 10 |
| How effective cannabis was in reducing period pain | 808 | 7.4 (2) | 7.8 (6.3 to 9) | 0.6 to 10 |
| How effective cannabis was in reducing chronic pelvic pain | 862 | 7.3 (2.1) | 7.9 (6 to 9) | 0 to 10 |
| How effective cannabis was in reducing nausea | 706 | 7.3 (2.8) | 8 (5.6 to 10) | 0 to 10 |
| How effective cannabis was in reducing back pain | 832 | 7.1 (2.3) | 7.6 (5.7 to 9) | 0 to 10 |
| How effective cannabis was in reducing anxiety | 742 | 6.6 (3) | 7.4 (5 to 9) | 0 to 10 |
| How effective cannabis was in reducing depression | 621 | 6.3 (3) | 7 (4.6 to 8.5) | 0 to 10 |
| How effective cannabis was in reducing headache or migraine | 646 | 6.2 (2.9) | 6.6 (4.4 to 8.3) | 0 to 10 |
| How effective cannabis was in reducing painful sex | 609 | 6 (3.2) | 6.7 (4 to 8.7) | 0 to 10 |
| How effective cannabis was in reducing bowel symptoms | 714 | 5.1 (3) | 5.1 (3 to 7.5) | 0 to 10 |
| How effective cannabis was in reducing gastrointestinal symptoms | 608 | 5 (3.1) | 5 (2.5 to 7.5) | 0 to 10 |
| How effective cannabis was in reducing bladder symptoms | 521 | 4.4 (3) | 5 (1.9 to 7) | 0 to 10 |
| How effective cannabis was in reducing fatigue | 698 | 3.8 (3.1) | 3.5 (1 to 6) | 0 to 10 |
| How effective cannabis was in reducing heavy menstrual bleeding | 406 | 2.4 (2.8) | 1.2 (0 to 4.2) | 0 to 10 |
