# Supplementary material for: “A dose of relief?”: Results of an international survey exploring self-reported effectiveness, dose and dosage forms of cannabis for endometriosis pain and related symptoms
Source: Research Square preprint supplement (doi:10.21203/rs.3.rs-6910005/v1), 2025-07-25
Supplement: Supplementary file 4 [file fb8a5887f02a378eb6a8c325.docx]

International Cannabis and Endometriosis Survey

Start of Block: Introduction

Q1.1

**Introduction**
Welcome to the Cannabis for Endometriosis Survey. Researchers from Western Sydney University and the University of New South Wales are interested in finding out how cannabis use affects your endometriosis symptoms. We want to know what varieties (i.e., strains) of cannabis you use, how you take them (e.g., smoked, vaped, eaten or by oil/tincture), the dose you use and cannabinoid levels/concentrations in the products chosen. We also want to know about your other prescribed and non-prescribed medication use, what side effects you may experience, and gather evidence of the severity and scope of your endometriosis through two questionnaires.

**Why are we doing this study**

Our research so far has found that people with endometriosis who live in Australia or New Zealand use cannabis, mostly from non-legal, non-prescribed or recreational sources, to help manage their endometriosis symptoms and reduce their endometriosis-related medication. We want to increase information on cannabis use for endometriosis in order to plan a clinical trial to investigate the safety, tolerability and effectiveness for cannabis for pain and the associated symptoms of endometriosis. It is very important that we get input from people in the community who have endometriosis, so we can be sure that we are designing an appropriate trial.

**Researchers involved**

The researchers involved with this project are Mr Justin Sinclair (PhD Candidate), Dr Mike Armour (Primary Supervisor), Prof Jerome Sarris, and Adjunct Prof David Pate, all from the NICM Health Research Institute of Western Sydney University, Australia, and Professor Jason Abbott from the University of New South Wales, Australia. This research project has been approved by the Western Sydney University Ethics Committee (H14115).   This research project has been funded by a Blackmores Institute Scholarship, forming part of Mr Sinclair's PhD degree program.

**Eligibility Criteria**

This survey is open to people worldwide who must fulfil the following:

- You must have been told by your medical doctor you have endometriosis;

- You must be aged between 18-55; and

- You must have used cannabis or cannabinoid-based products (e.g., cannabidiol (CBD) oil, cannabis oils, dried bud (flower) with known levels of THC and/or CBD, or non-legal or recreational cannabis), in the past 3 months specifically for the purpose of managing your endometriosis pain or related symptoms.

**Content of the survey**

The survey will ask about your background (such as your age and in which country you live), how your endometriosis was diagnosed, what symptoms you have and how you manage these. Questions about cannabis usage will be based upon the variety (or strain) of cannabis or cannabis product that you have used, the way you use it (known as a dosage form - such as smoked, vaped or oral ingestion), the amount of dose you use and how you rate its effectiveness in managing your symptoms. Other questions gather information such as any side effects that you have experienced, and if known from dispensary or label information, the concentration or levels of cannabinoids such as THC or CBD that was in your cannabis.   Lastly, you will be asked to complete two short questionnaires related to endometriosis (the Endometriosis Health Profile -30) and pelvic pain symptoms (the Pelvic Pain Impact Questionnaire) to allow the research team to compare the severity of endometriosis symptoms to other studies on endometriosis.

**What participation involves**

Participation in the study will involve completing an online survey that will take 15-30 minutes. You will be required to complete the survey in one sitting as we do not collect your IP or use cookies, to protect your privacy because you may be disclosing illegal activity if you are using cannabis when it is not legal to do so in your country or present location.

**Anonymity**

The survey is anonymous and no identifying data such as name, date of birth, address, or e-mail will be requested. We will remove any references to personal information in answers to open-ended questions that might allow someone to guess your identity.

**What will happen with the results**

It is intended that the collective results of this study will be published in journal articles, reports, and presented at conferences and other scientific meetings. Reports regarding safety and health effects, using a combination of the information we collect in the survey, may also be provided to specific groups/organisations to help facilitate safe practice. Only members of the research team will be able to see the individual answers you provide and only in an anonymous manner.

**Voluntary participation**

Your participation in this study is completely voluntary. Should you wish to withdraw at any stage before you submit your results, you are free to do so. Once you have submitted your results we are unable to remove them as they are anonymous and so we cannot identify which answers are yours.

**How to participate**

Please read the information sheet here for more information. If you would like to participate, please indicate that you have read and understood this information by clicking the right arrow below.   By clicking the right arrow > below, you acknowledge that:   - You have read and understood the information above; - Your participation will involve completing an online survey, and that the researchers may use the results as described above; - Participation in this survey is voluntary; and - The survey is anonymous, and any identifying information provided will be edited to ensure confidentiality

**It is important that you complete the survey only once.**

**Further information** Before you begin this survey, should you require any further information or have any concerns, please do not hesitate to contact Mr Justin Sinclair (+61 414679635 or J.Sinclair@westernsydney.edu.au).    If you have any complaints or reservations about the ethical conduct of this research, you may contact the Ethics Committee through Research Engagement, Development and Innovation (REDI)  at Tel +61 2 4736 0229 or e-mail humanethics@westernsydney.edu.au. Any issues you raise will be treated in confidence and investigated fully, and you will be informed of the outcome.

End of Block: Introduction

Start of Block: Demographics

Q2.1 These first set of questions are going to be asking about your endometriosis diagnosis, demographics and whether you qualify to complete this survey.

Q2.2 Have you been given a diagnosis of endometriosis?

- Yes (1)
- No (2)

Q2.3 How were you diagnosed with endometriosis? (If you have undergone multiple diagnostic methods, please select all that apply)

- Surgery (e.g., Laparoscopy) (1)
- Ultrasound (2)
- Magnetic Resonance Imaging (MRI) (3)
- Told by a medical doctor / specialist based on my symptoms (4)
- Other (please specify) (5) __________________________________________________

| 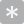 |
| --- |

Q2.4 What is your age in years?

________________________________________________________________

| 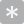 |
| --- |

Q2.5 How long (in years) has it been since you were diagnosed with endometriosis? (The first time a medical doctor / specialist **told** you that you had endometriosis).

________________________________________________________________

Q2.6 What is your highest level of education?

- Did not finish high school / secondary education (1)
- Completed high school / secondary education (2)
- Diploma / Certificate (3)
- Bachelor's Degree (4)
- Master's degree (5)
- PhD or other professional doctorate (6)

Q2.7 Do you identify as a particular ethnicity? (Optional)

________________________________________________________________

| 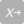 |
| --- |

Q2.8 In which country do you currently reside?

▼ Afghanistan (1) ... Zimbabwe (1357)

Display This Question:

If List of Countries = United States of America

Q2.9 In which U.S. state do you currently reside?

▼ Alabama (1) ... I do not reside in the United States (53)

Display This Question:

If List of Countries = Australia

Q2.10 In which Australian state do you currently reside?

- Australian Capital Territory (1)
- New South Wales (2)
- Northern Territory (3)
- Queensland (4)
- South Australia (5)
- Tasmania (6)
- Victoria (7)
- Western Australia (8)

Q2.11 Do you consider yourself to reside in:

- An urban area (e.g., City) (1)
- A rural area (2)
- A remote area (3)

Display This Question:

If Do you consider yourself to reside in: = A rural area

Or Do you consider yourself to reside in: = A remote area

Q2.12 Do you believe living in a rural or remote location has negatively impacted your ability to access medical care for your endometriosis?

- Strongly agree (1)
- Somewhat agree (2)
- Neither agree nor disagree (3)
- Somewhat disagree (4)
- Strongly disagree (5)

| 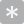 |
| --- |

Q2.13 What is your annual household income in your local currency ? (optional - please just enter the number itself - so if you earn $75000 US Dollars per year just enter 75000)

________________________________________________________________

Q2.14 Have you used cannabis or cannabinoid-based products (e.g., legal cannabidiol (CBD) oil, cannabis oils or dried bud (flower) with known levels of THC and/or CBD, and/or non-legal, non-prescribed or recreationally sourced cannabis) in the past 3 months for any reason?

- Yes - I've used it to manage my endometriosis symptoms (1)
- Yes - I've used it recreationally (2)
- Yes - I've used it both recreationally and for endometriosis symptom management (3)
- No (4)

End of Block: Demographics

Start of Block: Endometriosis symptoms

Q3.1 These next set of questions are going to be asking about your current symptoms of endometriosis and how you manage these.

Q3.2 What are your current endometriosis symptoms? (Please select all that apply to you).

- Period pain (Dysmenorrhea) (1)
- Heavy menstrual bleeding (2)
- Chronic pelvic pain (Pain below your belly button, not associated with menstrual bleeding) (3)
- Bowel symptoms (4)
- Bladder symptoms (5)
- Nausea (6)
- Back pain (7)
- Headache or migraine (8)
- Gastrointestinal symptoms (9)
- Fatigue (10)
- Anxiety (11)
- Depression (12)
- Difficulties with sleep (13)
- Painful sex (dyspareunia) (14)
- Other (15) __________________________________________________

Q3.3 What treatments or medications do you routinely use to treat your endometriosis symptoms? (Please select all that apply)? 

(*Routine use* is regular (daily or weekly) use in the past 3 months).

- Non-opioid pain medication (e.g., ibuprofen, paracetamol / acetaminophen) (1)
- Opioid-based pain medication (e.g., codeine, oxycontin, morphine, fentanyl) (2)
- Hormonal treatment (e.g., oral contraceptive pill, dienogest / visanne, mirena, lupron, elagolix / orilissa, goserlin acetate / zoladex). (3)
- Neuroleptic medication (e.g., lyrica / pregabalin or gabapentin) (4)
- Antidepressant medications (e.g., sertraline / zoloft, fluoxetine / prozac) (5)
- Anti-anxiety medications (e.g., alprazolam / xanax, diazepam / valium) (6)
- Sleeping medications (e.g., zolpidem tartrate / ambien) (7)
- Anti-nausea medication (e.g., metoclopramide / maxalon) (8)
- Acupuncture or tradtional Chinese medicine treatment (e.g., herbal medicine or moxibustion) (9)
- Physiotherapy / Pelvic exercises (e.g., delivered or prescribed by a qualified physiotherapist) (10)
- Herbal medicine (prescribed by a qualified professional such as a naturopath) (11)
- Other (12) __________________________________________________

Q3.4 What self-management strategies do you routinely use to treat your endometriosis symptoms? (Please select all that apply) 

(*Routine use* is regular (daily or weekly) use in the past 3 months).

- Acupressure (e.g., self-applied) (1)
- Breathing exercises (2)
- Dietary choices (e.g., gluten free, dairy free, vegetarian, vegan) (3)
- Heat (e.g., heat packs, hot water bottles) (4)
- Herbal medicines (purchased over the counter, but not prescribed for you) (5)
- Low intensity aerobic exercise (e.g., walking) (6)
- Massage (7)
- Meditation (8)
- Moderate to high intensity aerobic exercise (e.g., running, CrossFit, Zumba) (9)
- Dietary supplements or vitamins (e.g., Vitamin D or melatonin) (10)
- Pilates (11)
- Qi Gong (12)
- Tai Chi (13)
- Yoga (14)
- Other (15) __________________________________________________

| 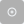 |
| --- |

Q3.5 Has your use of cannabis reduced your need to use pharmaceutical medications that you normally used for your endometriosis symptoms (e.g., a reduction in the amount of opioid medications you need)?

|  | Yes - completely stopped (1) | Yes - significant reduction (50% or more) (2) | Yes - moderate reduction (25-50%) (3) | Yes - minimal reduction (less than 25%) (4) | No - same amount of medication used (5) | No - increased amount of medication used (6) | Not applicable (7) |
| --- | --- | --- | --- | --- | --- | --- | --- |
| Non-opioid pain medication (e.g., ibuprofen, paracetamol / acetaminophen) (1) |  |  |  |  |  |  |  |
| Opioid-based pain medication (e.g., codeine, oxycontin, morphine, fentanyl) (2) |  |  |  |  |  |  |  |
| Hormonal treatment (e.g., oral contraceptive pill, dienogest / visanne, mirena, lupron, elagolix / orilissa, goserlin acetate / zoladex). (3) |  |  |  |  |  |  |  |
| Neuroleptic medication (e.g., lyrica / pregabalin or gabapentin) (4) |  |  |  |  |  |  |  |
| Antidepressant medications (e.g., sertraline / zoloft, fluoxetine / prozac) (5) |  |  |  |  |  |  |  |
| Anti-anxiety medications (e.g., alprazolam / xanax, diazepam / valium) (6) |  |  |  |  |  |  |  |
| Sleeping medications (e.g., zolpidem tartrate / ambien) (7) |  |  |  |  |  |  |  |
| Anti-nausea medication (e.g., metoclopramide / maxalon) (8) |  |  |  |  |  |  |  |
| Other (9) |  |  |  |  |  |  |  |

End of Block: Endometriosis symptoms

Start of Block: Cannabis questions

Q4.1 These next set of questions are going to be asking about your cannabis use for your endometriosis pain and symptoms. This is the longest section of the survey.

Q4.2 Can you legally buy cannabis and cannabinoid-based products (e.g., cannabidiol (CBD) oil, cannabis oils or dried bud (flower) with known levels of THC and/or CBD) in your country?

- Yes - there is both recreational and medical access (1)
- Yes - there is medical access only (2)
- Partially - cannabis is decriminalised, but not able to be purchased legally (3)
- No - can only access cannabis illicitly / illegally (4)

Q4.3 Have you informed your medical doctor or healthcare provider about your cannabis usage?

- Yes - cannabis usage was their suggestion (1)
- Yes - cannabis usage was my idea, but I informed them (2)
- Not yet - but I intend to tell them (3)
- No - I do not intend to tell them (Please explain) (4) __________________________________________________

Q4.4 From the list below, which best describes your cannabis usage to manage your endometriosis pain and associated symptoms?

- Medical Doctor Prescription (i.e., prescription by a physician to treat my endometriosis and / or associated conditions / symptoms, sourced from a legal dispensary or pharmacy / chemist, and taken following physician guidance) (1)
- Legal Therapeutic Self Administration (i.e., self-prescribed, self-sourced and / or self-administered from a legal recreational dispensary or supplier, or grown by yourself legally, to treat my endometriosis and / or associated conditions / symptoms) (2)
- Non-legal Therapeutic Self Administration (i.e., self-prescribed, self-sourced and / or self administered from a non-legal (i.e. black market) supplier, or grown by yourself illegally, to treat my endometriosis and / or associated conditions / symptoms) (3)

Q4.5 What was your motivation to start using cannabis as a management strategy for your endometriosis pain and associated symptoms? (Please select all that apply)

- Recommended by a medical professional (1)
- Recommended by an employee at a legal recreational cannabis dispensary (2)
- Recommended by an endometriosis support group (3)
- Recommended by a friend or work colleague with endometriosis (4)
- Inadequate pain control from pharmaceutical medications (5)
- Side effects of pharmaceutical medications were intolerable (6)
- Lack of finances / insurance to afford surgery for endometriosis (7)
- Lack of finances / insurance to afford pharmaceutical medications for endometriosis (8)
- Difficulty in finding access to medical expertise on endometriosis in your region (9)
- Was utilising cannabis recreationally and noticed pain and / or symptom reduction (10)
- Delayed or cancelled surgery due to COVID-19 (11)
- Other (Please explain) (12) __________________________________________________

Q4.6 How would you describe your cannabis use to manage your endometriosis related pain and associated symptoms?

- Multiple times a day (1)
- At least once a day (2)
- At least once a week (3)
- At least once a fortnight (i.e., every 2 weeks) (4)
- At least once a month (e.g., only around the time of menstruation) (5)

Q4.7 Based on your previous and current experience, will you continue to use cannabis or cannabinoid-based products into the future for your endometriosis-based symptoms?

- Yes (1)
- No (3)

Display This Question:

If Based on your previous and current experience, will you continue to use cannabis or cannabinoid-b... = Yes

Q4.8 If you will be continuing to use cannabis or cannabis-based products to manage your endometriosis symptoms, please pick from the reasons why below (Select all that apply).

- I find it to be more effective in managing my symptoms than my current or previous pharmaceutical medication. (1)
- I find the side effects to be less severe than my current or previous pharmaceutical medication. (2)
- I find it more cost-effective than my current or previous pharmaceutical medication. (3)
- I am concerned about dependance or addiction with my current or previous pharmaceutical medications. (4)
- I prefer what I consider to be a more natural product. (5)
- Other (6) __________________________________________________

Display This Question:

If Based on your previous and current experience, will you continue to use cannabis or cannabinoid-b... = Yes

Q4.9 Despite continuing to use cannabis or cannabis-based products to manage your endometriosis symptoms, do you have any of the following concerns (select all that apply)?

- I am concerned about dependence on cannabis. (1)
- I am concerned about the cost of using cannabis. (2)
- I am concerned that by using cannabis I am breaking the law where I live. (3)
- I am concerned about being tested as part of my employment. (4)
- I am concerned that I might be detected by police via mobile drug testing, and potentially lose my licence. (5)
- I am worried I will be judged due to the stigma associated with cannabis use. (6)
- I am worried about judgement (or punishment) from people within my religion or culture. (7)
- I am concerned about potential adulterants and lack of quality in illicitly sourced cannabis. (8)
- Other (please explain) (9) __________________________________________________

Q4.10 Would you recommend cannabis as a treatment option for a friend or relative with endometriosis?

- Yes (1)
- Maybe (2)
- No (3)

Display This Question:

If Based on your previous and current experience, will you continue to use cannabis or cannabinoid-b... = No

Q4.11 Why did you decide to stop using cannabis or cannabinoid-based products for your endometriosis-based symptoms? (Please select all that apply)

- I found it ineffective. (1)
- I found the experience / side effects unpleasant. (2)
- I cannot afford it. (3)
- I find access to products difficult. (4)
- I am concerned that by using cannabis I am breaking the law where I live. (5)
- I am concerned that I might be detected by police via mobile drug testing, and potentially lose my licence. (6)
- I am concerned about being tested as part of my employment. (7)
- I am worried I will be judged due to the stigma associated with cannabis use. (8)
- I am worried about judgement (or punishment) from people within my religion or culture. (9)
- I was concerned about potential adulterants and lack of quality in illicitly sourced cannabis. (10)
- Other (Please explain) (11) __________________________________________________

Q4.12 How long (in years) have you been using cannabis (whether legal or illegal) to manage the pain and associated symptoms of endometriosis? (If less than a year, type in number of months followed by M, e.g., 6M means 6 months)

________________________________________________________________

| 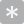 |
| --- |

Q4.13 On average, how much in your local currency are you spending per week on all forms of cannabis / cannabinoid-based products (e.g., dried buds (flower), vape pens, concentrates, oral oils, edibles, etc.) used to manage your endometriosis pain and symptoms?

(Just enter the number itself, not the currency)

________________________________________________________________

Q4.14 Have you ever experienced any side effects associated with your cannabis or cannabinoid-based product usage?

- Yes (1)
- No (2)

Display This Question:

If Have you ever experienced any side effects associated with your cannabis or cannabinoid-based pro... = Yes

Q4.15 What side effects did you experience? (Select all that apply)

- Feelings of relaxation and euphoria (1)
- Spontaneous laughter or excitement (2)
- Depression (3)
- Increased appetite (4)
- Dry mouth (5)
- Memory impairment (6)
- Reduced cognitive functioning (difficulty thinking) (7)
- Slower reflexes (8)
- Bloodshot eyes (9)
- Increased heart rate (10)
- Mild anxiety or paranoia (11)
- Dependence (12)
- Tolerance (13)
- Cannabinoid Hyperemesis Syndrome (With formal diagnosis from a physician) (14)
- Headache (15)
- Drowsiness / fatigue (16)
- Dizziness (17)
- Change in blood pressure (18)
- Abnormal heart beat (19)
- Distortion of your sense of time (20)
- Acute lung irritation / brief cough (21)
- Chronic lung irritation / prolonged cough (22)
- Other (23) __________________________________________________

Q4.16 From the list below, please indicate ALL of the cannabis methods of administration (e.g., dosage forms) that you have **tried** to assist in managing your endometriosis-related symptoms.

- Dried cannabis bud (flower) - joints (1)
- Dried cannabis bud (flower) - vaporiser (2)
- Dried cannabis bud (flower) - pipe (3)
- Dried cannabis bud (flower) - bong (water pipe) (4)
- Inhaled oil concentrate (via "dab rigs" etc.) or hashish /resin (via pipe) (5)
- Dried cannabis bud (flower) - infusion / tea (6)
- Fresh cannabis bud (flower) or leaf - juiced (7)
- Cannabis edibles - homemade (8)
- Cannabis edibles - dispensary bought (9)
- Oral tincture (alcohol / glycerin based) (10)
- Capsules (11)
- Oil (oral) (e.g., THC/CBD oil) (12)
- Dissolvable strips (13)
- Sublingual sprays (14)
- Medicated lozenges (15)
- Topical cream / lotion (16)
- Transdermal patch (17)
- Pessary (inserted into the vagina) (18)
- Suppository (inserted into the rectum) (19)

Carry Forward Selected Choices from "From the list below, please indicate ALL of the cannabis methods of administration (e.g., dosage forms) that you have tried to assist in managing your endometriosis-related symptoms. "

| 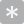 | 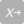 |
| --- | --- |

Q4.17 Of the methods of administration (e.g., dosage forms) you have tried, please choose from the following list**up to THREE methods** you have found to be **most effective**, and you continue to use, for your endometriosis-related symptoms.

- Dried cannabis bud (flower) - joints (1)
- Dried cannabis bud (flower) - vaporiser (2)
- Dried cannabis bud (flower) - pipe (3)
- Dried cannabis bud (flower) - bong (water pipe) (4)
- Inhaled oil concentrate (via "dab rigs" etc.) or hashish /resin (via pipe) (5)
- Dried cannabis bud (flower) - infusion / tea (6)
- Fresh cannabis bud (flower) or leaf - juiced (7)
- Cannabis edibles - homemade (8)
- Cannabis edibles - dispensary bought (9)
- Oral tincture (alcohol / glycerin based) (10)
- Capsules (11)
- Oil (oral) (e.g., THC/CBD oil) (12)
- Dissolvable strips (13)
- Sublingual sprays (14)
- Medicated lozenges (15)
- Topical cream / lotion (16)
- Transdermal patch (17)
- Pessary (inserted into the vagina) (18)
- Suppository (inserted into the rectum) (19)

Q4.18 On a scale from 0-10 (0 being totally ineffective and 10 being totally effective), how effective was cannabis in reducing your endometriosis related symptoms? If you did not have a particular symptom, please check the Not Applicable box next to that symptom.

|  | Not Applicable |
| --- | --- |

|  | 0 | 10 |
| --- | --- | --- |

| Period pain (dysmenorrhea) () | 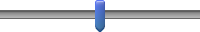 |
| --- | --- |
| Heavy menstrual bleeding () | 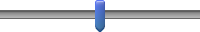 |
| Chronic pelvic pain (pain below your belly button not associated with menstrual bleeding) () | 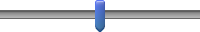 |
| Bowel symptoms () | 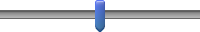 |
| Bladder symptoms () | 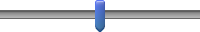 |
| Nausea () | 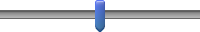 |
| Back pain () | 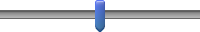 |
| Headache or migraine () | 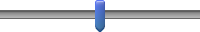 |
| Gastrointestinal symptoms () | 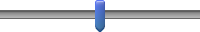 |
| Fatigue () | 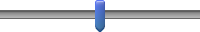 |
| Anxiety () | 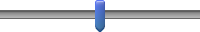 |
| Depression () | 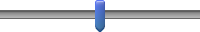 |
| Difficulties with sleep () | 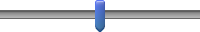 |
| Painful sex (dyspareunia) () | 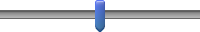 |
| Other () | 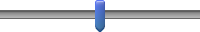 |

Display This Question:

If If Of the methods of administration (e.g., dosage forms) you have tried, please choose from the following list&nbsp;up to THREE methods&nbsp;you have found to be most effective, and you continue to us... Dried cannabis bud (flower) - joints Is Selected

Or Or Of the methods of administration (e.g., dosage forms) you have tried, please choose from the following list&nbsp;up to THREE methods&nbsp;you have found to be most effective, and you continue to us... Dried cannabis bud (flower) - vaporiser Is Selected

Or Or Of the methods of administration (e.g., dosage forms) you have tried, please choose from the following list&nbsp;up to THREE methods&nbsp;you have found to be most effective, and you continue to us... Dried cannabis bud (flower) - pipe Is Selected

Or Or Of the methods of administration (e.g., dosage forms) you have tried, please choose from the following list&nbsp;up to THREE methods&nbsp;you have found to be most effective, and you continue to us... Dried cannabis bud (flower) - bong (water pipe) Is Selected

Or Or Of the methods of administration (e.g., dosage forms) you have tried, please choose from the following list&nbsp;up to THREE methods&nbsp;you have found to be most effective, and you continue to us... Inhaled oil concentrate (via "dab rigs" etc.) or hashish /resin (via pipe) Is Selected

Q4.19 Please select the reasons why you continue to use inhaled cannabis as a preferred method of administration for your endometriosis management (Select all that apply).

- It was recommended by my doctor. (1)
- It was recommended by friends or colleagues with endometriosis. (2)
- It provides fast relief of symptoms. (3)
- Side effects are more manageable. (4)
- It allows me to tailor the correct dose I require. (5)
- It is all that is available to me through non-legal sources. (6)
- other (please explain) (7) __________________________________________________

Display This Question:

If If Of the methods of administration (e.g., dosage forms) you have tried, please choose from the following list&nbsp;up to THREE methods&nbsp;you have found to be most effective, and you continue to us... Dried cannabis bud (flower) - joints Is Selected

Or Or Of the methods of administration (e.g., dosage forms) you have tried, please choose from the following list&nbsp;up to THREE methods&nbsp;you have found to be most effective, and you continue to us... Dried cannabis bud (flower) - vaporiser Is Selected

Or Or Of the methods of administration (e.g., dosage forms) you have tried, please choose from the following list&nbsp;up to THREE methods&nbsp;you have found to be most effective, and you continue to us... Dried cannabis bud (flower) - pipe Is Selected

Or Or Of the methods of administration (e.g., dosage forms) you have tried, please choose from the following list&nbsp;up to THREE methods&nbsp;you have found to be most effective, and you continue to us... Dried cannabis bud (flower) - bong (water pipe) Is Selected

Or Or Of the methods of administration (e.g., dosage forms) you have tried, please choose from the following list&nbsp;up to THREE methods&nbsp;you have found to be most effective, and you continue to us... Inhaled oil concentrate (via "dab rigs" etc.) or hashish /resin (via pipe) Is Selected

Q4.20 How long after using inhaled cannabis does it take for you to feel an effect on your endometriosis-related symptoms?

- Less than 5 minutes (1)
- 5 - 10 minutes (2)
- 11 - 20 minutes (3)
- 21 -30 minutes (4)
- Longer than 30 minutes (5)

Display This Question:

If If Of the methods of administration (e.g., dosage forms) you have tried, please choose from the following list&nbsp;up to THREE methods&nbsp;you have found to be most effective, and you continue to us... Dried cannabis bud (flower) - joints Is Selected

Or Or Of the methods of administration (e.g., dosage forms) you have tried, please choose from the following list&nbsp;up to THREE methods&nbsp;you have found to be most effective, and you continue to us... Dried cannabis bud (flower) - vaporiser Is Selected

Or Or Of the methods of administration (e.g., dosage forms) you have tried, please choose from the following list&nbsp;up to THREE methods&nbsp;you have found to be most effective, and you continue to us... Dried cannabis bud (flower) - pipe Is Selected

Or Or Of the methods of administration (e.g., dosage forms) you have tried, please choose from the following list&nbsp;up to THREE methods&nbsp;you have found to be most effective, and you continue to us... Dried cannabis bud (flower) - bong (water pipe) Is Selected

Or Or Of the methods of administration (e.g., dosage forms) you have tried, please choose from the following list&nbsp;up to THREE methods&nbsp;you have found to be most effective, and you continue to us... Inhaled oil concentrate (via "dab rigs" etc.) or hashish /resin (via pipe) Is Selected

Q4.21 If known from the packaging or information provided with your dried cannabis bud (flower) or concentrate, what concentration (as a percentage) of tetrahydrocannabinol (THC) and cannabidiol (CBD) is present in the cannabis you prefer to use by inhalation?

- Tetrahydrocannabinol (THC) % (1) __________________________________________________
- Cannabidiol (CBD) % (2) __________________________________________________

Display This Question:

If If Of the methods of administration (e.g., dosage forms) you have tried, please choose from the following list&nbsp;up to THREE methods&nbsp;you have found to be most effective, and you continue to us... Dried cannabis bud (flower) - joints Is Selected

Or Or Of the methods of administration (e.g., dosage forms) you have tried, please choose from the following list&nbsp;up to THREE methods&nbsp;you have found to be most effective, and you continue to us... Dried cannabis bud (flower) - vaporiser Is Selected

Or Or Of the methods of administration (e.g., dosage forms) you have tried, please choose from the following list&nbsp;up to THREE methods&nbsp;you have found to be most effective, and you continue to us... Dried cannabis bud (flower) - pipe Is Selected

Or Or Of the methods of administration (e.g., dosage forms) you have tried, please choose from the following list&nbsp;up to THREE methods&nbsp;you have found to be most effective, and you continue to us... Dried cannabis bud (flower) - bong (water pipe) Is Selected

Or Or Of the methods of administration (e.g., dosage forms) you have tried, please choose from the following list&nbsp;up to THREE methods&nbsp;you have found to be most effective, and you continue to us... Inhaled oil concentrate (via "dab rigs" etc.) or hashish /resin (via pipe) Is Selected

Q4.22 If applicable and known from the packaging or information provided with your dried cannabis bud (flower) or concentrate, what is the name (i.e., strain name or product name) of the preferred cannabis variety or product that you find assists your endometriosis-related symptoms the most when inhaled? (If unknown please leave blank).

________________________________________________________________

Q4.23 If applicable and known from the packaging or information provided with your cannabis, please choose from the list of terpenes (components in cannabis that contribute to the smell) below that you feel also contribute therapeutically to the cannabis variety (e.g., strain) or product that you prefer to use by inhalation. If unknown, please leave blank.

- Caryophyllene (1)
- Limonene (2)
- Linalool (3)
- Myrcene (4)
- Pinene (5)
- Terpinolene (6)
- Other (please write) (7)

Display This Question:

If If Of the methods of administration (e.g., dosage forms) you have tried, please choose from the following list&nbsp;up to THREE methods&nbsp;you have found to be most effective, and you continue to us... Dried cannabis bud (flower) - joints Is Selected

Or Or Of the methods of administration (e.g., dosage forms) you have tried, please choose from the following list&nbsp;up to THREE methods&nbsp;you have found to be most effective, and you continue to us... Dried cannabis bud (flower) - vaporiser Is Selected

Or Or Of the methods of administration (e.g., dosage forms) you have tried, please choose from the following list&nbsp;up to THREE methods&nbsp;you have found to be most effective, and you continue to us... Dried cannabis bud (flower) - pipe Is Selected

Or Or Of the methods of administration (e.g., dosage forms) you have tried, please choose from the following list&nbsp;up to THREE methods&nbsp;you have found to be most effective, and you continue to us... Dried cannabis bud (flower) - bong (water pipe) Is Selected

| 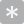 |
| --- |

Q4.24 What is the average amount of dried cannabis bud / flower (in grams) that you inhale per session in order to medicate yourself with to achieve therapeutic benefit? (Please enter the amount using numbers only - if you use less than 1 gram please use a decimal e.g., 500mg would be 0.5)

________________________________________________________________

Display This Question:

If If What is the average amount of dried cannabis bud / flower (in grams) that you inhale per session in order to medicate yourself with to achieve therapeutic benefit? (Please enter the amount using nu... Text Response Is Displayed

Q4.25 On average, how many times per day will you use inhaled cannabis to manage your endometriosis-related symptoms?

- Once (1)
- Two to three times per day (2)
- Four or more times per day (3)
- I do not need to use cannabis daily (4)

Display This Question:

If If Of the methods of administration (e.g., dosage forms) you have tried, please choose from the following list&nbsp;up to THREE methods&nbsp;you have found to be most effective, and you continue to us... Fresh cannabis bud (flower) or leaf - juiced Is Selected

Or Or Of the methods of administration (e.g., dosage forms) you have tried, please choose from the following list&nbsp;up to THREE methods&nbsp;you have found to be most effective, and you continue to us... Dried cannabis bud (flower) - infusion / tea Is Selected

Or Or Of the methods of administration (e.g., dosage forms) you have tried, please choose from the following list&nbsp;up to THREE methods&nbsp;you have found to be most effective, and you continue to us... Cannabis edibles - homemade Is Selected

Or Or Of the methods of administration (e.g., dosage forms) you have tried, please choose from the following list&nbsp;up to THREE methods&nbsp;you have found to be most effective, and you continue to us... Cannabis edibles - dispensary bought Is Selected

Or Or Of the methods of administration (e.g., dosage forms) you have tried, please choose from the following list&nbsp;up to THREE methods&nbsp;you have found to be most effective, and you continue to us... Oral tincture (alcohol / glycerin based) Is Selected

Or Or Of the methods of administration (e.g., dosage forms) you have tried, please choose from the following list&nbsp;up to THREE methods&nbsp;you have found to be most effective, and you continue to us... Capsules Is Selected

Or Or Of the methods of administration (e.g., dosage forms) you have tried, please choose from the following list&nbsp;up to THREE methods&nbsp;you have found to be most effective, and you continue to us... Oil (oral) (e.g., THC/CBD oil) Is Selected

Or Or Of the methods of administration (e.g., dosage forms) you have tried, please choose from the following list&nbsp;up to THREE methods&nbsp;you have found to be most effective, and you continue to us... Dissolvable strips Is Selected

Or Or Of the methods of administration (e.g., dosage forms) you have tried, please choose from the following list&nbsp;up to THREE methods&nbsp;you have found to be most effective, and you continue to us... Sublingual sprays Is Selected

Or Or Of the methods of administration (e.g., dosage forms) you have tried, please choose from the following list&nbsp;up to THREE methods&nbsp;you have found to be most effective, and you continue to us... Medicated lozenges Is Selected

Q4.26 Please select the reasons why you continue to use oral cannabis as a preferred method of administration for your endometriosis management (Select all that apply).

- It was recommended by my doctor. (1)
- It was recommended by friends or colleagues with endometriosis. (2)
- It was recommended by a dispensary worker / pharmacist. (3)
- It provides longer lasting relief of symptoms. (4)
- Side effects are more manageable. (5)
- It allows me to tailor the correct dose I require. (6)
- Other (please explain) (7) __________________________________________________

Display This Question:

If If Of the methods of administration (e.g., dosage forms) you have tried, please choose from the following list&nbsp;up to THREE methods&nbsp;you have found to be most effective, and you continue to us... Dried cannabis bud (flower) - infusion / tea Is Selected

Or Or Of the methods of administration (e.g., dosage forms) you have tried, please choose from the following list&nbsp;up to THREE methods&nbsp;you have found to be most effective, and you continue to us... Fresh cannabis bud (flower) or leaf - juiced Is Selected

Or Or Of the methods of administration (e.g., dosage forms) you have tried, please choose from the following list&nbsp;up to THREE methods&nbsp;you have found to be most effective, and you continue to us... Cannabis edibles - homemade Is Selected

Or Or Of the methods of administration (e.g., dosage forms) you have tried, please choose from the following list&nbsp;up to THREE methods&nbsp;you have found to be most effective, and you continue to us... Cannabis edibles - dispensary bought Is Selected

Or Or Of the methods of administration (e.g., dosage forms) you have tried, please choose from the following list&nbsp;up to THREE methods&nbsp;you have found to be most effective, and you continue to us... Oral tincture (alcohol / glycerin based) Is Selected

Or Or Of the methods of administration (e.g., dosage forms) you have tried, please choose from the following list&nbsp;up to THREE methods&nbsp;you have found to be most effective, and you continue to us... Capsules Is Selected

Or Or Of the methods of administration (e.g., dosage forms) you have tried, please choose from the following list&nbsp;up to THREE methods&nbsp;you have found to be most effective, and you continue to us... Oil (oral) (e.g., THC/CBD oil) Is Selected

Or Or Of the methods of administration (e.g., dosage forms) you have tried, please choose from the following list&nbsp;up to THREE methods&nbsp;you have found to be most effective, and you continue to us... Dissolvable strips Is Selected

Or Or Of the methods of administration (e.g., dosage forms) you have tried, please choose from the following list&nbsp;up to THREE methods&nbsp;you have found to be most effective, and you continue to us... Sublingual sprays Is Selected

Or Or Of the methods of administration (e.g., dosage forms) you have tried, please choose from the following list&nbsp;up to THREE methods&nbsp;you have found to be most effective, and you continue to us... Medicated lozenges Is Selected

Q4.27 How long after using oral cannabis (e.g., THC/CBD oral oil, capsules etc.) does it take for you to feel an effect on your endometriosis-related symptoms?

- Less than 20 minutes (1)
- 21 - 40 minutes (2)
- 41 - 60 minutes (3)
- 61 - 90 minutes (4)
- Longer than 90 minutes (5)

Display This Question:

If If Of the methods of administration (e.g., dosage forms) you have tried, please choose from the following list&nbsp;up to THREE methods&nbsp;you have found to be most effective, and you continue to us... Fresh cannabis bud (flower) or leaf - juiced Is Selected

Or Or Of the methods of administration (e.g., dosage forms) you have tried, please choose from the following list&nbsp;up to THREE methods&nbsp;you have found to be most effective, and you continue to us... Cannabis edibles - homemade Is Selected

Or Or Of the methods of administration (e.g., dosage forms) you have tried, please choose from the following list&nbsp;up to THREE methods&nbsp;you have found to be most effective, and you continue to us... Dried cannabis bud (flower) - infusion / tea Is Selected

Or Or Of the methods of administration (e.g., dosage forms) you have tried, please choose from the following list&nbsp;up to THREE methods&nbsp;you have found to be most effective, and you continue to us... Cannabis edibles - dispensary bought Is Selected

Or Or Of the methods of administration (e.g., dosage forms) you have tried, please choose from the following list&nbsp;up to THREE methods&nbsp;you have found to be most effective, and you continue to us... Oral tincture (alcohol / glycerin based) Is Selected

Or Or Of the methods of administration (e.g., dosage forms) you have tried, please choose from the following list&nbsp;up to THREE methods&nbsp;you have found to be most effective, and you continue to us... Capsules Is Selected

Or Or Of the methods of administration (e.g., dosage forms) you have tried, please choose from the following list&nbsp;up to THREE methods&nbsp;you have found to be most effective, and you continue to us... Oil (oral) (e.g., THC/CBD oil) Is Selected

Or Or Of the methods of administration (e.g., dosage forms) you have tried, please choose from the following list&nbsp;up to THREE methods&nbsp;you have found to be most effective, and you continue to us... Dissolvable strips Is Selected

Or Or Of the methods of administration (e.g., dosage forms) you have tried, please choose from the following list&nbsp;up to THREE methods&nbsp;you have found to be most effective, and you continue to us... Sublingual sprays Is Selected

Or Or Of the methods of administration (e.g., dosage forms) you have tried, please choose from the following list&nbsp;up to THREE methods&nbsp;you have found to be most effective, and you continue to us... Medicated lozenges Is Selected

Q4.28 If known from the packaging or information provided with your oral cannabis products, what amount (expressed as mg / mL or mg / g) of tetrahydrocannabinol (THC) and cannabidiol (CBD) is present in the cannabis you prefer to use?

- Tetrahydrocannabinol (THC) mg / mL or mg / g (1) __________________________________________________
- Cannabidiol (CBD) mg / mL or mg / g (2) __________________________________________________

Display This Question:

If If Of the methods of administration (e.g., dosage forms) you have tried, please choose from the following list&nbsp;up to THREE methods&nbsp;you have found to be most effective, and you continue to us... Dried cannabis bud (flower) - infusion / tea Is Selected

Or Or Of the methods of administration (e.g., dosage forms) you have tried, please choose from the following list&nbsp;up to THREE methods&nbsp;you have found to be most effective, and you continue to us... Fresh cannabis bud (flower) or leaf - juiced Is Selected

Or Or Of the methods of administration (e.g., dosage forms) you have tried, please choose from the following list&nbsp;up to THREE methods&nbsp;you have found to be most effective, and you continue to us... Cannabis edibles - homemade Is Selected

Or Or Of the methods of administration (e.g., dosage forms) you have tried, please choose from the following list&nbsp;up to THREE methods&nbsp;you have found to be most effective, and you continue to us... Cannabis edibles - dispensary bought Is Selected

Or Or Of the methods of administration (e.g., dosage forms) you have tried, please choose from the following list&nbsp;up to THREE methods&nbsp;you have found to be most effective, and you continue to us... Oral tincture (alcohol / glycerin based) Is Selected

Or Or Of the methods of administration (e.g., dosage forms) you have tried, please choose from the following list&nbsp;up to THREE methods&nbsp;you have found to be most effective, and you continue to us... Capsules Is Selected

Or Or Of the methods of administration (e.g., dosage forms) you have tried, please choose from the following list&nbsp;up to THREE methods&nbsp;you have found to be most effective, and you continue to us... Oil (oral) (e.g., THC/CBD oil) Is Selected

Or Or Of the methods of administration (e.g., dosage forms) you have tried, please choose from the following list&nbsp;up to THREE methods&nbsp;you have found to be most effective, and you continue to us... Dissolvable strips Is Selected

Or Or Of the methods of administration (e.g., dosage forms) you have tried, please choose from the following list&nbsp;up to THREE methods&nbsp;you have found to be most effective, and you continue to us... Sublingual sprays Is Selected

Or Or Of the methods of administration (e.g., dosage forms) you have tried, please choose from the following list&nbsp;up to THREE methods&nbsp;you have found to be most effective, and you continue to us... Medicated lozenges Is Selected

Q4.29 If known from the packaging or information provided with your oral cannabis product, what is the name (i.e., strain name or product name) of the preferred cannabis product that you find assists your endometriosis-related symptoms the most when used orally? (If unknown please leave blank).

________________________________________________________________

Q4.30 If applicable and known from the packaging or information provided with your cannabis, please choose from the list of terpenes (components in cannabis that contribute to the smell) below that you feel also contribute therapeutically to the cannabis variety (e.g., strain) or product that you prefer to use orally. If unknown, please leave blank.

- Carophyllene (1)
- Limonene (2)
- Linalool (3)
- Myrcene (4)
- Pinene (5)
- Terpinolene (6)
- Other (Please write) (7)

Display This Question:

If If Of the methods of administration (e.g., dosage forms) you have tried, please choose from the following list&nbsp;up to THREE methods&nbsp;you have found to be most effective, and you continue to us... Dried cannabis bud (flower) - infusion / tea Is Selected

Or Or Of the methods of administration (e.g., dosage forms) you have tried, please choose from the following list&nbsp;up to THREE methods&nbsp;you have found to be most effective, and you continue to us... Fresh cannabis bud (flower) or leaf - juiced Is Selected

Or Or Of the methods of administration (e.g., dosage forms) you have tried, please choose from the following list&nbsp;up to THREE methods&nbsp;you have found to be most effective, and you continue to us... Cannabis edibles - homemade Is Selected

Or Or Of the methods of administration (e.g., dosage forms) you have tried, please choose from the following list&nbsp;up to THREE methods&nbsp;you have found to be most effective, and you continue to us... Cannabis edibles - dispensary bought Is Selected

Or Or Of the methods of administration (e.g., dosage forms) you have tried, please choose from the following list&nbsp;up to THREE methods&nbsp;you have found to be most effective, and you continue to us... Oral tincture (alcohol / glycerin based) Is Selected

Or Or Of the methods of administration (e.g., dosage forms) you have tried, please choose from the following list&nbsp;up to THREE methods&nbsp;you have found to be most effective, and you continue to us... Capsules Is Selected

Or Or Of the methods of administration (e.g., dosage forms) you have tried, please choose from the following list&nbsp;up to THREE methods&nbsp;you have found to be most effective, and you continue to us... Oil (oral) (e.g., THC/CBD oil) Is Selected

Or Or Of the methods of administration (e.g., dosage forms) you have tried, please choose from the following list&nbsp;up to THREE methods&nbsp;you have found to be most effective, and you continue to us... Dissolvable strips Is Selected

Or Or Of the methods of administration (e.g., dosage forms) you have tried, please choose from the following list&nbsp;up to THREE methods&nbsp;you have found to be most effective, and you continue to us... Sublingual sprays Is Selected

Or Or Of the methods of administration (e.g., dosage forms) you have tried, please choose from the following list&nbsp;up to THREE methods&nbsp;you have found to be most effective, and you continue to us... Medicated lozenges Is Selected

Q4.31 What is the average amount of tetrahydrocannabinol (THC) in the products you use orally in order to achieve a therapeutic benefit per medication session?

|  | 0 | 1 | 2 | 3 | 4 | 5 | 6 | 7 | 8 | 9 | 10 |
| --- | --- | --- | --- | --- | --- | --- | --- | --- | --- | --- | --- |

| mg of THC used per dose / medication session () | 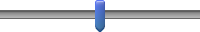 |
| --- | --- |
| If more than 10mg of THC per dose / medication session is used, please type in the amount. () | 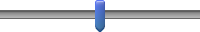 |

Display This Question:

If If Of the methods of administration (e.g., dosage forms) you have tried, please choose from the following list&nbsp;up to THREE methods&nbsp;you have found to be most effective, and you continue to us... Dried cannabis bud (flower) - infusion / tea Is Selected

Or Or Of the methods of administration (e.g., dosage forms) you have tried, please choose from the following list&nbsp;up to THREE methods&nbsp;you have found to be most effective, and you continue to us... Fresh cannabis bud (flower) or leaf - juiced Is Selected

Or Or Of the methods of administration (e.g., dosage forms) you have tried, please choose from the following list&nbsp;up to THREE methods&nbsp;you have found to be most effective, and you continue to us... Cannabis edibles - homemade Is Selected

Or Or Of the methods of administration (e.g., dosage forms) you have tried, please choose from the following list&nbsp;up to THREE methods&nbsp;you have found to be most effective, and you continue to us... Cannabis edibles - dispensary bought Is Selected

Or Or Of the methods of administration (e.g., dosage forms) you have tried, please choose from the following list&nbsp;up to THREE methods&nbsp;you have found to be most effective, and you continue to us... Oral tincture (alcohol / glycerin based) Is Selected

Or Or Of the methods of administration (e.g., dosage forms) you have tried, please choose from the following list&nbsp;up to THREE methods&nbsp;you have found to be most effective, and you continue to us... Capsules Is Selected

Or Or Of the methods of administration (e.g., dosage forms) you have tried, please choose from the following list&nbsp;up to THREE methods&nbsp;you have found to be most effective, and you continue to us... Oil (oral) (e.g., THC/CBD oil) Is Selected

Or Or Of the methods of administration (e.g., dosage forms) you have tried, please choose from the following list&nbsp;up to THREE methods&nbsp;you have found to be most effective, and you continue to us... Dissolvable strips Is Selected

Or Or Of the methods of administration (e.g., dosage forms) you have tried, please choose from the following list&nbsp;up to THREE methods&nbsp;you have found to be most effective, and you continue to us... Sublingual sprays Is Selected

Or Or Of the methods of administration (e.g., dosage forms) you have tried, please choose from the following list&nbsp;up to THREE methods&nbsp;you have found to be most effective, and you continue to us... Medicated lozenges Is Selected

Q4.32 What is the average amount of cannabidiol (CBD) in the products you use orally in order to achieve therapeutic benefit per medication session?

|  | 0 | 10 | 20 | 30 | 40 | 50 | 60 | 70 | 80 | 90 | 100 |
| --- | --- | --- | --- | --- | --- | --- | --- | --- | --- | --- | --- |

| mg of CBD used per dose / medication session () | 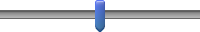 |
| --- | --- |
| If more than 100 mg of CBD per dose / medication session is used, please type in the amount. () | 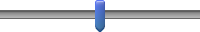 |

Display This Question:

If What is the average amount of tetrahydrocannabinol (THC) in the products you use orally in order... [ mg of THC used per dose / medication session ] , Is Displayed

Or Or What is the average amount of tetrahydrocannabinol (THC) in the products you use orally in order to achieve a therapeutic benefit per medication session?&nbsp; If more than 10mg of THC per dose / medication session is used, please type in the amount. Is Displayed

Or What is the average amount of cannabidiol (CBD) in the products you use orally in order to achiev... [ mg of CBD used per dose / medication session ] , Is Displayed

Or Or What is the average amount of cannabidiol (CBD) in the products you use orally in order to achiev... If more than 100 mg of CBD per dose / medication session is used, please type in the amount. Is Displayed

Q4.33 On average, how many times per day will you use oral cannabis products to manage your endometriosis-related symptoms?

- Once (1)
- Two to three times per day (2)
- Four or more times per day (3)
- I do not need to use cannabis daily (4)

Display This Question:

If If Of the methods of administration (e.g., dosage forms) you have tried, please choose from the following list&nbsp;up to THREE methods&nbsp;you have found to be most effective, and you continue to us... Fresh cannabis bud (flower) or leaf - juiced Is Selected

| 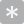 |
| --- |

Q4.34 If you utilise fresh juiced cannabis leaf and flower to manage your endometriosis symptoms, how much pressed juice (in mL) do you consume per dose?

________________________________________________________________

Display This Question:

If If Of the methods of administration (e.g., dosage forms) you have tried, please choose from the following list&nbsp;up to THREE methods&nbsp;you have found to be most effective, and you continue to us... Fresh cannabis bud (flower) or leaf - juiced Is Selected

Q4.35 On average, how many times per day will you use juiced cannabis to manage your endometriosis-related symptoms?

- Once (1)
- Two to three times per day (2)
- Four or more times per day (3)
- I do not need to use cannabis daily (4)

Display This Question:

If If Of the methods of administration (e.g., dosage forms) you have tried, please choose from the following list&nbsp;up to THREE methods&nbsp;you have found to be most effective, and you continue to us... Topical cream / lotion Is Selected

Or Or Of the methods of administration (e.g., dosage forms) you have tried, please choose from the following list&nbsp;up to THREE methods&nbsp;you have found to be most effective, and you continue to us... Transdermal patch Is Selected

Q4.36 Please select the reasons why you continue to use topical cannabis as a preferred method of administration for your endometriosis management (Select all that apply).

- It was recommended by my doctor. (1)
- It was recommended by friends or colleagues with endometriosis. (2)
- It was recommended by a dispensary worker / pharmacist. (3)
- It provides longer lasting relief of symptoms. (4)
- Side effects are more manageable. (5)
- It allows me to tailor the correct dose I require. (6)
- Other (please explain) (7) __________________________________________________

Display This Question:

If If Of the methods of administration (e.g., dosage forms) you have tried, please choose from the following list&nbsp;up to THREE methods&nbsp;you have found to be most effective, and you continue to us... Topical cream / lotion Is Selected

Or Or Of the methods of administration (e.g., dosage forms) you have tried, please choose from the following list&nbsp;up to THREE methods&nbsp;you have found to be most effective, and you continue to us... Transdermal patch Is Selected

Q4.37 How long after using topical cannabis (e.g., topical cream / lotion, transdermal patch etc.) does it take for you to feel an effect on your endometriosis-related symptoms?

- Less than 20 minutes (1)
- 21 - 40 minutes (2)
- 41 - 60 minutes (3)
- 61 - 90 minutes (4)
- Longer than 90 minutes (5)

Display This Question:

If If Of the methods of administration (e.g., dosage forms) you have tried, please choose from the following list&nbsp;up to THREE methods&nbsp;you have found to be most effective, and you continue to us... Topical cream / lotion Is Selected

Or Or Of the methods of administration (e.g., dosage forms) you have tried, please choose from the following list&nbsp;up to THREE methods&nbsp;you have found to be most effective, and you continue to us... Transdermal patch Is Selected

Q4.38 If known from the packaging or information provided with your topical cannabis products, what amount (expressed as mg / mL or mg / g) of tetrahydrocannabinol (THC) and cannabidiol (CBD) is present in the cannabis you prefer to use?

- Tetrahydrocannabinol (THC) mg / mL or mg / g (1) __________________________________________________
- Cannabidiol (CBD) mg / mL or mg / g (2) __________________________________________________

Display This Question:

If If Of the methods of administration (e.g., dosage forms) you have tried, please choose from the following list&nbsp;up to THREE methods&nbsp;you have found to be most effective, and you continue to us... Topical cream / lotion Is Selected

Or Or Of the methods of administration (e.g., dosage forms) you have tried, please choose from the following list&nbsp;up to THREE methods&nbsp;you have found to be most effective, and you continue to us... Transdermal patch Is Selected

Q4.39 If known from the packaging or information provided with your topical cannabis product, what is the name (i.e., strain name or product name) of the preferred cannabis product that you find assists your endometriosis-related symptoms the most when used topically? (If unknown please leave blank).

________________________________________________________________

Display This Question:

If If Of the methods of administration (e.g., dosage forms) you have tried, please choose from the following list&nbsp;up to THREE methods&nbsp;you have found to be most effective, and you continue to us... Topical cream / lotion Is Selected

Or Or Of the methods of administration (e.g., dosage forms) you have tried, please choose from the following list&nbsp;up to THREE methods&nbsp;you have found to be most effective, and you continue to us... Transdermal patch Is Selected

Q4.40 What is the average amount of tetrahydrocannabinol (THC) in the products you use topically in order to achieve therapeutic benefit per medication session?

|  | 0 | 1 | 2 | 3 | 4 | 5 | 6 | 7 | 8 | 9 | 10 |
| --- | --- | --- | --- | --- | --- | --- | --- | --- | --- | --- | --- |

| mg of THC used per dose / medication session () | 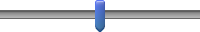 |
| --- | --- |
| If more than 10mg of THC per dose / medication session is used, please type in the amount. () | 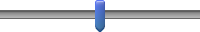 |

Display This Question:

If If Of the methods of administration (e.g., dosage forms) you have tried, please choose from the following list&nbsp;up to THREE methods&nbsp;you have found to be most effective, and you continue to us... Topical cream / lotion Is Selected

Or Or Of the methods of administration (e.g., dosage forms) you have tried, please choose from the following list&nbsp;up to THREE methods&nbsp;you have found to be most effective, and you continue to us... Transdermal patch Is Selected

Q4.41 What is the average amount of cannabidiol (CBD) in the products you use topically in order to achieve therapeutic benefit per medication session?

|  | 0 | 10 | 20 | 30 | 40 | 50 | 60 | 70 | 80 | 90 | 100 |
| --- | --- | --- | --- | --- | --- | --- | --- | --- | --- | --- | --- |

| mg of CBD used per dose / medication session () | 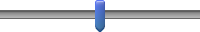 |
| --- | --- |
| If more than 100 mg of CBD per dose / medication session is used, please type in the amount. () | 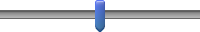 |

Display This Question:

If What is the average amount of tetrahydrocannabinol (THC) in the products you use topically in ord... [ mg of THC used per dose / medication session ] , Is Displayed

Or Or What is the average amount of tetrahydrocannabinol (THC) in the products you use topically in ord... If more than 10mg of THC per dose / medication session is used, please type in the amount. Is Displayed

Or What is the average amount of cannabidiol (CBD) in the products you use topically in order to ach... [ mg of CBD used per dose / medication session ] , Is Displayed

Or Or What is the average amount of cannabidiol (CBD) in the products you use topically in order to ach... If more than 100 mg of CBD per dose / medication session is used, please type in the amount. Is Displayed

Q4.42 On average, how many times per day will you use topical cannabis products to manage your endometriosis-related symptoms?

- Once (1)
- Two to three times per day (2)
- Four or more times per day (3)
- I do not need to use cannabis daily (4)

Display This Question:

If If Of the methods of administration (e.g., dosage forms) you have tried, please choose from the following list&nbsp;up to THREE methods&nbsp;you have found to be most effective, and you continue to us... Pessary (inserted into the vagina) Is Selected

Or Or Of the methods of administration (e.g., dosage forms) you have tried, please choose from the following list&nbsp;up to THREE methods&nbsp;you have found to be most effective, and you continue to us... Suppository (inserted into the rectum) Is Selected

Q4.43 Do you use a cannabis infused pessary (inserted into the vagina) or suppository (inserted into the rectum) for your endometriosis-related symptoms?

- Pessary (1)
- Suppository (2)
- Both pessary and suppository (3)

Display This Question:

If If Of the methods of administration (e.g., dosage forms) you have tried, please choose from the following list&nbsp;up to THREE methods&nbsp;you have found to be most effective, and you continue to us... Pessary (inserted into the vagina) Is Selected

Or Or Of the methods of administration (e.g., dosage forms) you have tried, please choose from the following list&nbsp;up to THREE methods&nbsp;you have found to be most effective, and you continue to us... Suppository (inserted into the rectum) Is Selected

Q4.44 Please select the reasons why you continue to use cannabis as a pessary or suppository as a preferred method of administration for your endometriosis management (Select all that apply).

- It was recommended by my doctor. (1)
- It was recommended by friends or colleagues with endometriosis. (2)
- It was recommended by a dispensary worker / pharmacist. (3)
- It provides longer lasting relief of symptoms. (4)
- Side effects are more manageable. (5)
- It allows me to tailor the correct dose I require. (6)
- Other (please explain) (7) __________________________________________________

Display This Question:

If If Of the methods of administration (e.g., dosage forms) you have tried, please choose from the following list&nbsp;up to THREE methods&nbsp;you have found to be most effective, and you continue to us... Pessary (inserted into the vagina) Is Selected

Or Or Of the methods of administration (e.g., dosage forms) you have tried, please choose from the following list&nbsp;up to THREE methods&nbsp;you have found to be most effective, and you continue to us... Suppository (inserted into the rectum) Is Selected

Q4.45 How long after using a cannabis infused pessary or suppository does it take for you to feel an effect on your endometriosis-related symptoms?

- Less than 20 minutes (1)
- 21 - 40 minutes (2)
- 41 - 60 minutes (3)
- 61 - 90 minutes (4)
- Longer than 90 minutes (5)

Display This Question:

If If Of the methods of administration (e.g., dosage forms) you have tried, please choose from the following list&nbsp;up to THREE methods&nbsp;you have found to be most effective, and you continue to us... Pessary (inserted into the vagina) Is Selected

Or Or Of the methods of administration (e.g., dosage forms) you have tried, please choose from the following list&nbsp;up to THREE methods&nbsp;you have found to be most effective, and you continue to us... Suppository (inserted into the rectum) Is Selected

Q4.46 If known from the packaging or information provided with your cannabis pessary or suppository, what amount (expressed as mg / mL or mg / g) of tetrahydrocannabinol (THC) and cannabidiol (CBD) is present in the product you prefer to use?

- Tetrahydrocannabinol (THC) mg / mL or mg / g (1) __________________________________________________
- Cannabidiol (CBD) mg / mL or mg / g (2) __________________________________________________

Display This Question:

If If Of the methods of administration (e.g., dosage forms) you have tried, please choose from the following list&nbsp;up to THREE methods&nbsp;you have found to be most effective, and you continue to us... Pessary (inserted into the vagina) Is Selected

Or Or Of the methods of administration (e.g., dosage forms) you have tried, please choose from the following list&nbsp;up to THREE methods&nbsp;you have found to be most effective, and you continue to us... Suppository (inserted into the rectum) Is Selected

Q4.47 If known from the packaging or information provided with your cannabis pessary or suppository, what is the name (i.e., strain name or product name) of the preferred cannabis product that you find assists your endometriosis-related symptoms the most when used as a pessary or suppository? (If unknown please leave blank).

________________________________________________________________

Display This Question:

If If Of the methods of administration (e.g., dosage forms) you have tried, please choose from the following list&nbsp;up to THREE methods&nbsp;you have found to be most effective, and you continue to us... Pessary (inserted into the vagina) Is Selected

Or Or Of the methods of administration (e.g., dosage forms) you have tried, please choose from the following list&nbsp;up to THREE methods&nbsp;you have found to be most effective, and you continue to us... Suppository (inserted into the rectum) Is Selected

Q4.48 What is the average amount of tetrahydrocannabinol (THC) in the pessary or suppository that you use in order to achieve therapeutic benefit per medication session?

|  | 0 | 1 | 2 | 3 | 4 | 5 | 6 | 7 | 8 | 9 | 10 |
| --- | --- | --- | --- | --- | --- | --- | --- | --- | --- | --- | --- |

| mg of THC used per dose / medication session () | 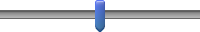 |
| --- | --- |
| If more than 10mg of THC per dose / medication session is used, please type in the amount. () | 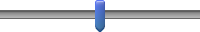 |

Display This Question:

If If Of the methods of administration (e.g., dosage forms) you have tried, please choose from the following list&nbsp;up to THREE methods&nbsp;you have found to be most effective, and you continue to us... Pessary (inserted into the vagina) Is Selected

Or Or Of the methods of administration (e.g., dosage forms) you have tried, please choose from the following list&nbsp;up to THREE methods&nbsp;you have found to be most effective, and you continue to us... Suppository (inserted into the rectum) Is Selected

Q4.49 What is the average amount of cannabidiol (CBD) in the pessary or suppository that you use in order to achieve therapeutic benefit per medication session?

|  | 0 | 10 | 20 | 30 | 40 | 50 | 60 | 70 | 80 | 90 | 100 |
| --- | --- | --- | --- | --- | --- | --- | --- | --- | --- | --- | --- |

| mg of CBD used per dose / medication session () | 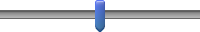 |
| --- | --- |
| If more than 100 mg of CBD per dose / medication session is used, please type in the amount. () | 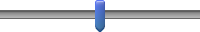 |

Display This Question:

If What is the average amount of tetrahydrocannabinol (THC) in the pessary or suppository that you u... [ mg of THC used per dose / medication session ] , Is Displayed

Or Or What is the average amount of tetrahydrocannabinol (THC) in the pessary or suppository that you use in order to achieve therapeutic benefit per medication session?&nbsp; If more than 10mg of THC per dose / medication session is used, please type in the amount. Is Displayed

Or What is the average amount of cannabidiol (CBD) in the pessary or suppository that you use in ord... [ mg of CBD used per dose / medication session ] , Is Displayed

Or Or What is the average amount of cannabidiol (CBD) in the pessary or suppository that you use in ord... If more than 100 mg of CBD per dose / medication session is used, please type in the amount. Is Displayed

Q4.50 On average, how many times per day will you use a pessary or suppository cannabis product to manage your endometriosis-related symptoms?

- Once (1)
- Two to three times per day (2)
- Four or more times per day (3)
- I do not need to use cannabis daily (4)

End of Block: Cannabis questions

Start of Block: Pelvic Pain Impact Questionnaire

Q5.1 You are now past the halfway mark for the survey. The next section is asking you questions about your pelvic pain (Pelvic Pain Impact Questionnaire)

Q5.2 In the past month, how much has your pelvic pain affected your:

|  | Not at all (1) | A little bit (2) | Somewhat (3) | Quite a bit (4) | A great deal (5) |
| --- | --- | --- | --- | --- | --- |
| energy levels? (1) |  |  |  |  |  |
| mood? (2) |  |  |  |  |  |
| sleep? (3) |  |  |  |  |  |
| stomach and intestinal functions? (4) |  |  |  |  |  |
| ability to sit for longer than 20 minutes? (5) |  |  |  |  |  |
| ability to perform and function normally at home / school / university / work? (6) |  |  |  |  |  |
| ability to take part in physical activity? (e.g. jogging, yoga, bicycling) (7) |  |  |  |  |  |
| ability to wear certain clothes? (e.g. underwear, tight fitting clothes) (8) |  |  |  |  |  |

Q5.3 If the following questions apply to you, please answer. If not, please leave these blank.

|  | Not at all (1) | A little bit (2) | Somewhat (3) | Quite a bit (4) | A great deal (5) |
| --- | --- | --- | --- | --- | --- |
| During your last period, how much did your pelvic pain affect your ability to use tampons? (1) |  |  |  |  |  |
| In the past month, how much has your pelvic pain affected your levels of intimacy or sexual relationships? (e.g. having sex, masturbating) (2) |  |  |  |  |  |

End of Block: Pelvic Pain Impact Questionnaire

Start of Block: EHP-30

Q6.1 The next 30 questions are asking specifically about your endometriosis symptoms. Your answers will help researchers be able to assess the severity of your symptoms.

Q6.2 Endometriosis Health Profile-30 (EHP-30) 
(© Copyright, Oxford University Innovation 2001. All Rights Reserved. The authors, being Professor Crispin Jenkinson, Professor Stephen Kennedy and Dr. Georgina Jones, have asserted their moral rights)


DURING THE LAST 4 WEEKS, HOW OFTEN, BECAUSE OF YOUR ENDOMETRIOSIS, HAVE YOU...

|  | Never (1) (1) | Rarely (2) (2) | Sometimes (3) (3) | Often (4) (4) | Always (5) (5) |
| --- | --- | --- | --- | --- | --- |
| 1. Been unable to go to social events because of the pain (1) |  |  |  |  |  |
| 2. Been unable to do jobs around the home because of the pain? (2) |  |  |  |  |  |
| 3. Found it difficult to stand because of the pain? (3) |  |  |  |  |  |
| 4. Found it difficult to sit because of the pain? (4) |  |  |  |  |  |
| 5. Found it difficult to walk because of the pain? (5) |  |  |  |  |  |
| 6. Found it difficult to exercise or do the leisure activities you would like to do because of the pain? (6) |  |  |  |  |  |
| 7. Lost your appetite and/or been unable to eat because of the pain? (7) |  |  |  |  |  |
| 8. Been unable to sleep properly because of the pain? (8) |  |  |  |  |  |
| 9. Had to go to bed/lie down because of the pain? (9) |  |  |  |  |  |
| 10. Been unable to do the things you want to do because of the pain? (10) |  |  |  |  |  |
| 11. Felt unable to cope with the pain? (11) |  |  |  |  |  |
| 12. Generally felt unwell? (12) |  |  |  |  |  |
| 13. Felt frustrated because your symptoms are not getting better? (13) |  |  |  |  |  |
| 14. Felt frustrated because you are not able to control your symptoms? (14) |  |  |  |  |  |
| 15. Felt unable to forget your symptoms? (15) |  |  |  |  |  |
| 16. Felt as though your symptoms are ruling your life? (16) |  |  |  |  |  |
| 17. Felt your symptoms are taking away your life? (17) |  |  |  |  |  |
| 18. Felt depressed? (18) |  |  |  |  |  |
| 19. Felt weepy/tearful? (19) |  |  |  |  |  |
| 20. Felt miserable? (20) |  |  |  |  |  |
| 21. Had mood swings? (21) |  |  |  |  |  |
| 22. Felt bad tempered or short tempered? (22) |  |  |  |  |  |
| 23. Felt violent or aggressive? (23) |  |  |  |  |  |
| 24. Felt unable to tell people how you feel? (24) |  |  |  |  |  |
| 25. Felt others do not understand what you are going through? (25) |  |  |  |  |  |
| 26. Felt as though others think you are moaning? (26) |  |  |  |  |  |
| 27. Felt alone? (27) |  |  |  |  |  |
| 28.Felt frustrated as you cannot always wear the clothes you would choose? (28) |  |  |  |  |  |
| 29. Felt your appearance has been affected? (29) |  |  |  |  |  |
| 30. Lacked confidence? (30) |  |  |  |  |  |

End of Block: EHP-30

Start of Block: Final questions

Q7.1 Thank you for participating in this survey. These last 3 questions are asking about your thoughts on new cannabis products that may be developed for endometriosis symptoms.

Q7.2 If a cannabis product was developed that could be used either as a pessary (inserted into the vagina) or a suppository (inserted into the rectum) which reduced the potential for intoxicating effects (i.e feeling high) would this be potentially of interest to you?

- Definitely interested (1)
- Possibly interested (2)
- Unsure (3)
- Possibly not interested (4)
- Definitely not interested (5)

Q7.3 Would you prefer a pessary (inserted into the vagina) or a suppository (inserted into the rectum)

- Prefer pessiary (vaginal) (1)
- Prefer suppository (rectum) (2)
- No preference (3)

Q7.4 What would be important factors for you in choosing to use a pessary and/or suppository for your endometriosis symptoms?  (i.e., things you would want the product to provide)

- Less or no intoxicating effects (not feeling 'high') (1)
- Long duration of pain relief (2)
- Quick onset of pain relief (3)
- Ease of administration (4)
- Other (please explain) (5) __________________________________________________

End of Block: Final questions

Start of Block: Not Eligible

Display This Question:

If Have you been given a diagnosis of endometriosis? = No

Or Or What is your age in years? Text Response Is Greater Than or Equal to 55

Or Or What is your age in years? Text Response Is Less Than or Equal to 17

Or Have you used cannabis or cannabinoid-based products (e.g., legal cannabidiol (CBD) oil, cannabis... = No

Q8.1 Thank you for your time and interest in our survey - unfortunately, you are not eligible to participate.

End of Block: Not Eligible
